# Supplementary material for: Safety evaluation of Plukenetia volubilis seeds: a metabolomic profiling and network toxicology approach
Source: Royal Society of Chemistry journal article supplement (doi:10.1039/d4ra03767g), 2024-01-01
Supplement: d4ra03767g1.pdf [file d4ra03767g1.pdf]

## Supplementary Information

### **Safety evaluation of *Plukenetia volubilis* seeds: A metabolomic profiling and network toxicology approach**

## Contents

|                                                                                                        |    |
|--------------------------------------------------------------------------------------------------------|----|
| Figure S1. $^1\text{H}$ NMR spectrum (300 MHz) of MeOH extract in MeOH- $d_4$ .....                    | 4  |
| Figure S2. $^1\text{H}$ NMR spectrum (300 MHz) of EtOAc layer in MeOH- $d_4$ .....                     | 4  |
| Figure S3. $^1\text{H}$ NMR spectrum (300 MHz) of <i>n</i> -BuOH layer in MeOH- $d_4$ .....            | 5  |
| Figure S4. $^1\text{H}$ NMR spectrum (300 MHz) of H <sub>2</sub> O layer in MeOH- $d_4$ .....          | 5  |
| Figure S5. $^1\text{H}$ NMR spectrum (300 MHz) of fraction PV-Bu-1 in CDCl <sub>3</sub> .....          | 6  |
| Figure S6. $^1\text{H}$ NMR spectrum (300 MHz) of fraction PV-Bu-2 in CDCl <sub>3</sub> .....          | 6  |
| Figure S7. $^1\text{H}$ NMR spectrum (300 MHz) of fraction PV-Bu-3 in CDCl <sub>3</sub> .....          | 7  |
| Figure S8. $^1\text{H}$ NMR spectrum (300 MHz) of fraction PV-Bu-4 in CDCl <sub>3</sub> .....          | 7  |
| Figure S9. $^1\text{H}$ NMR spectrum (300 MHz) of fraction PV-Bu-5 in CDCl <sub>3</sub> .....          | 8  |
| Figure S10. $^1\text{H}$ NMR spectrum (300 MHz) of fraction PV-Bu-6 in CDCl <sub>3</sub> .....         | 8  |
| Figure S11. $^1\text{H}$ NMR spectrum (300 MHz) of fraction PV-Bu-7 in CDCl <sub>3</sub> .....         | 9  |
| Figure S12. $^1\text{H}$ NMR spectrum (300 MHz) of fraction PV-Bu-8 in CDCl <sub>3</sub> .....         | 9  |
| Figure S13. $^1\text{H}$ NMR spectrum (300 MHz) of fraction PV-Bu-9 in CDCl <sub>3</sub> .....         | 10 |
| Figure S14. $^1\text{H}$ NMR spectrum (300 MHz) of fraction PV-H <sub>2</sub> O-1 in MeOH- $d_4$ ..... | 10 |
| Figure S15. $^1\text{H}$ NMR spectrum (300 MHz) of fraction PV-H <sub>2</sub> O-2 in MeOH- $d_4$ ..... | 11 |
| Figure S16. $^1\text{H}$ NMR spectrum (300 MHz) of fraction PV-H <sub>2</sub> O-3 in MeOH- $d_4$ ..... | 11 |
| Figure S17. $^1\text{H}$ NMR spectrum (300 MHz) of fraction PV-H <sub>2</sub> O-4 in MeOH- $d_4$ ..... | 12 |
| Figure S18. $^1\text{H}$ NMR spectrum (300 MHz) of fraction PV-H <sub>2</sub> O-5 in MeOH- $d_4$ ..... | 12 |
| Figure S19. $^1\text{H}$ NMR spectrum (300 MHz) of fraction PV-H <sub>2</sub> O-6 in MeOH- $d_4$ ..... | 13 |
| Figure S20. GC-MS spectrum of the SI oil FAMES.....                                                    | 14 |
| Figure S21. GC-MS spectrum of the <i>n</i> -hexane layer FAMES.....                                    | 14 |
| Figure S22. GC-MS spectrum of the EtOAc layer FAMES.....                                               | 14 |
| Figure S23. GC-MS spectrum of the saponified SI oil.....                                               | 15 |
| Figure S24. GC-MS spectrum of the saponified <i>n</i> -hexane layer.....                               | 15 |

|                                                                                       |    |
|---------------------------------------------------------------------------------------|----|
| Figure S25. GC-MS spectrum of the saponified EtOAc layer .....                        | 15 |
| Figure S26. The metabolomic classification of fractions PV-Bu-1-9 .....               | 16 |
| Figure S27. The metabolomic classification of fractions PV-H <sub>2</sub> O-1-6 ..... | 17 |
| Figure S28. The MS <sup>2</sup> spectra of compounds <b>1-4</b> .....                 | 18 |
| Figure S29. The MS <sup>2</sup> spectra of compounds <b>5-7</b> .....                 | 19 |
| Detailed parameters used in the MZmine software .....                                 | 20 |
| Table S1. Calibration curve, range, precision and accuracy of trigonelline .....      | 21 |

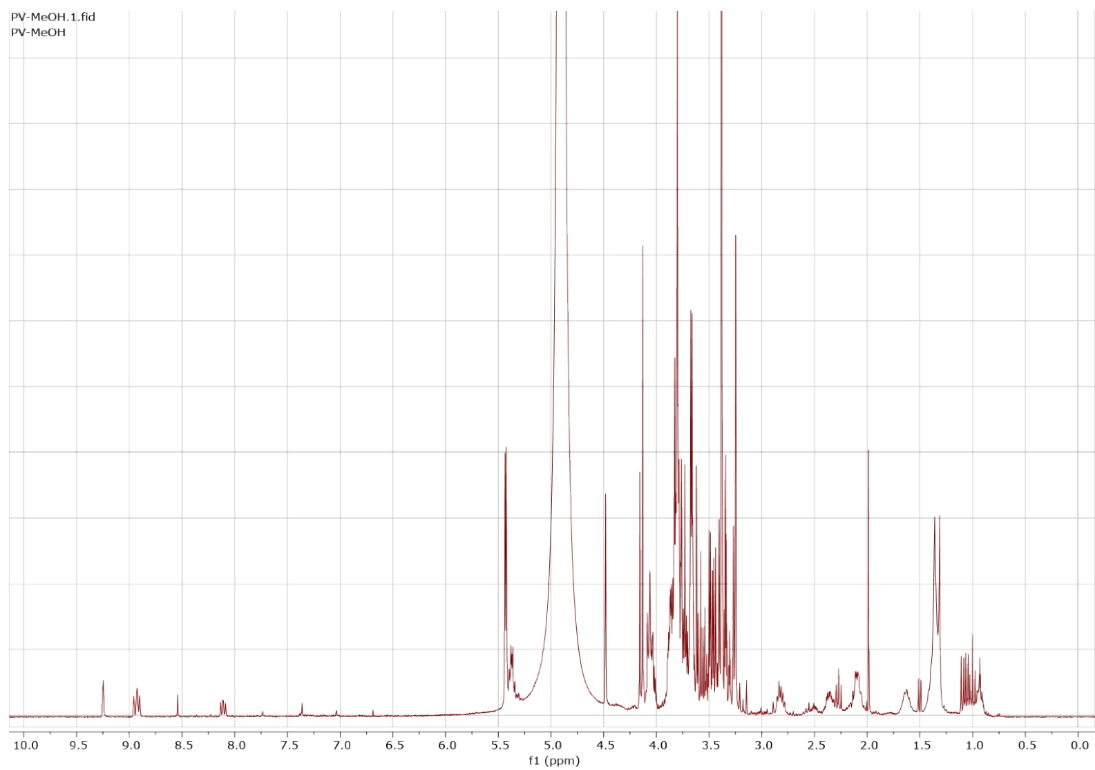

Figure S1.  $^1\text{H}$  NMR spectrum (300 MHz) of MeOH extract in  $\text{MeOH-}d_4$

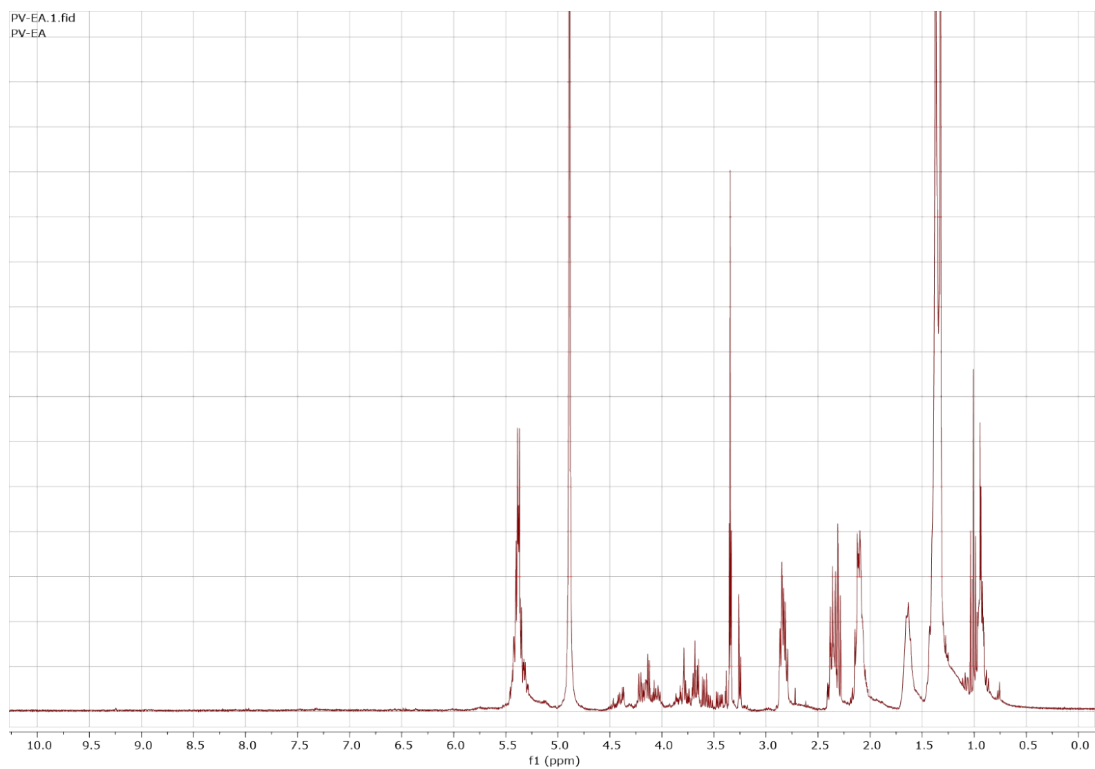

Figure S2.  $^1\text{H}$  NMR spectrum (300 MHz) of EtOAc layer in  $\text{MeOH-}d_4$

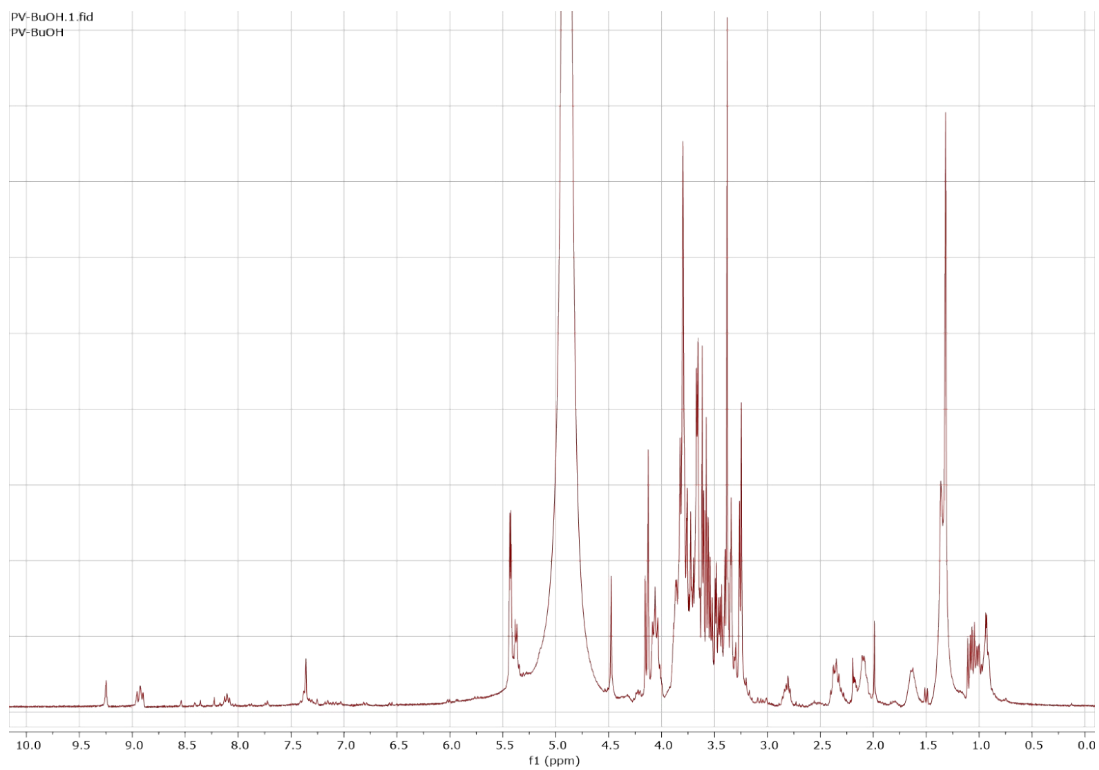

Figure S3. <sup>1</sup>H NMR spectrum (300 MHz) of *n*-BuOH layer in MeOH-*d*<sub>4</sub>

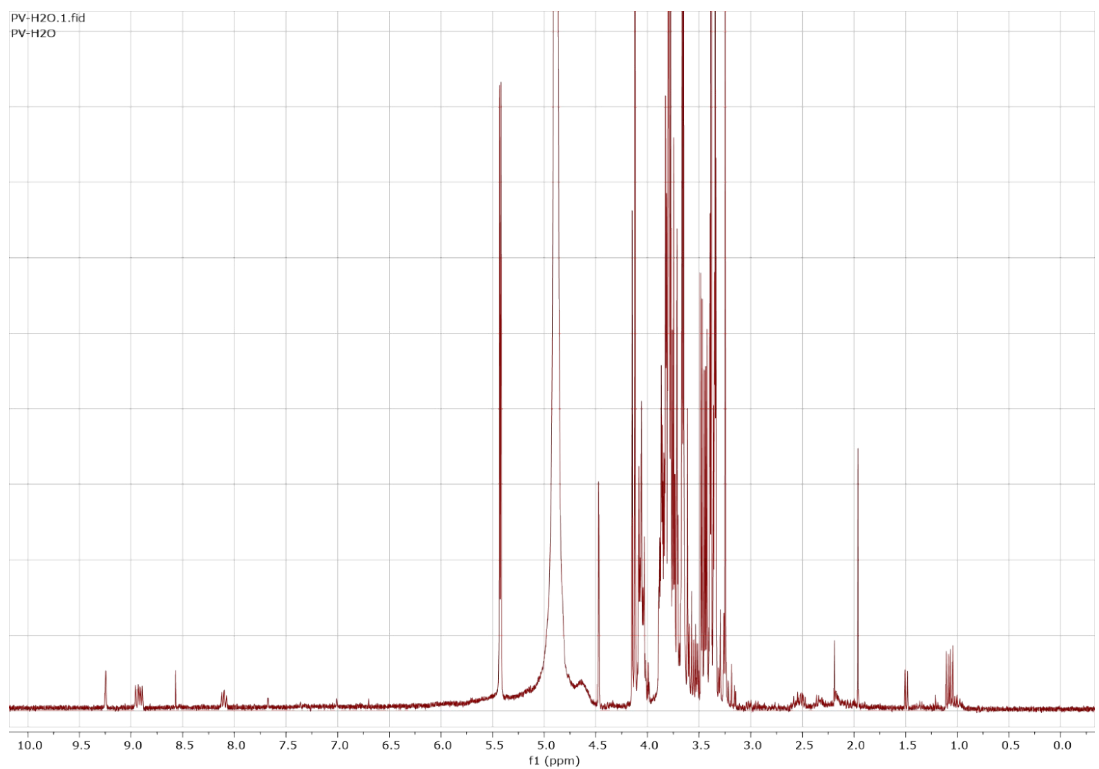

Figure S4. <sup>1</sup>H NMR spectrum (300 MHz) of H<sub>2</sub>O layer in MeOH-*d*<sub>4</sub>

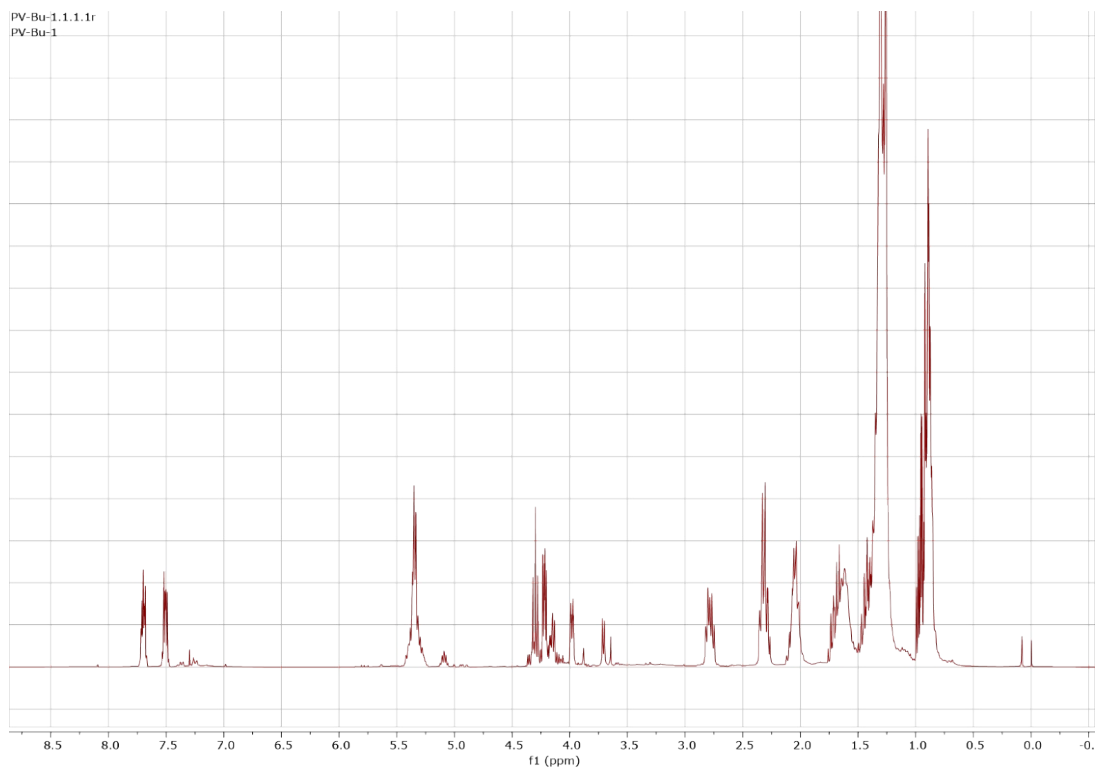

Figure S5.  $^1\text{H}$  NMR spectrum (300 MHz) of fraction PV-Bu-1 in  $\text{CDCl}_3$

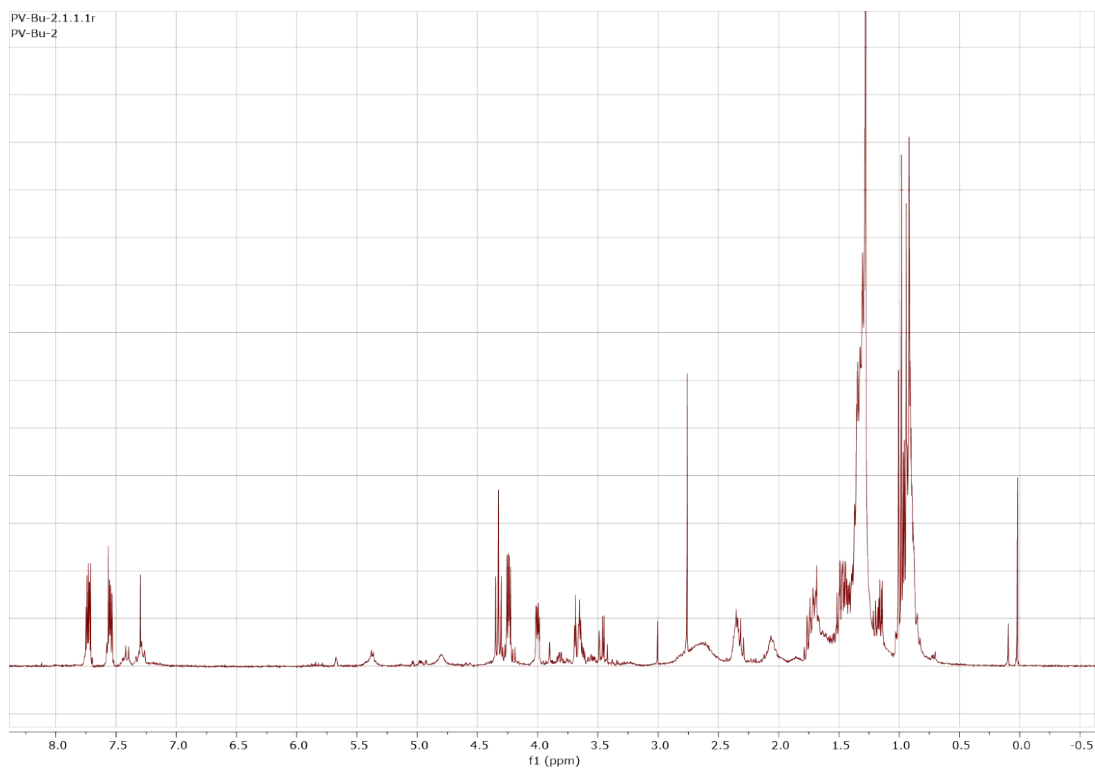

Figure S6.  $^1\text{H}$  NMR spectrum (300 MHz) of fraction PV-Bu-2 in  $\text{CDCl}_3$

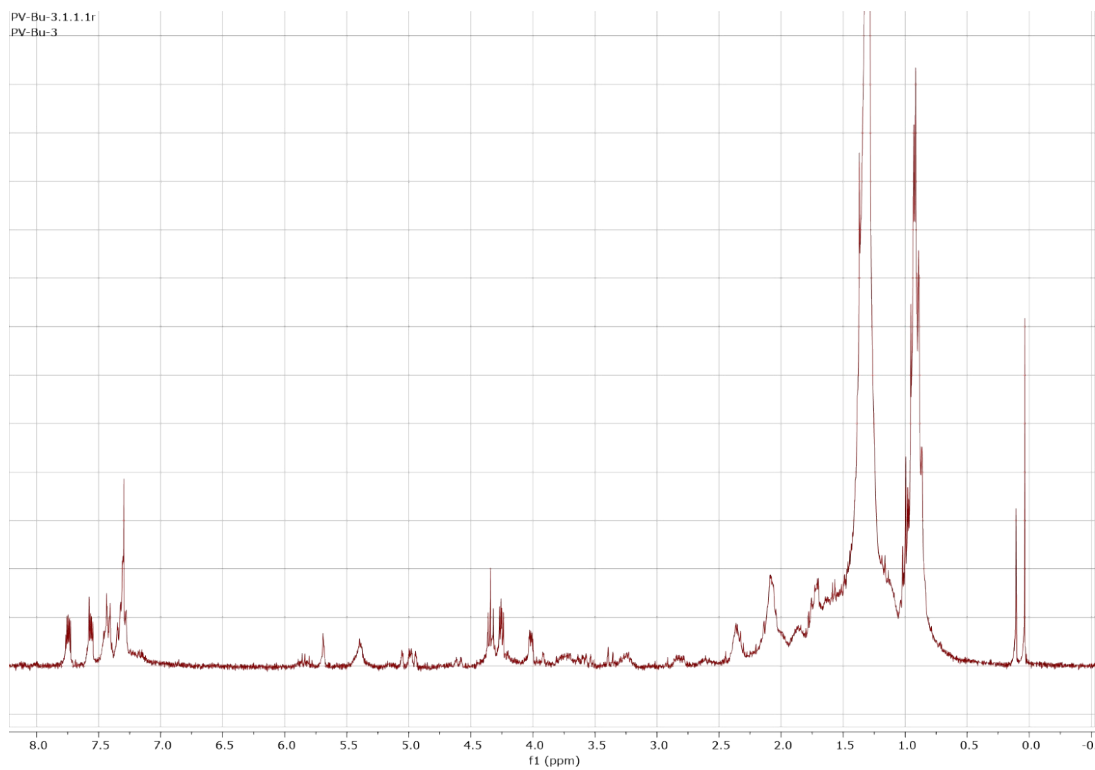

Figure S7.  $^1\text{H}$  NMR spectrum (300 MHz) of fraction PV-Bu-3 in  $\text{CDCl}_3$

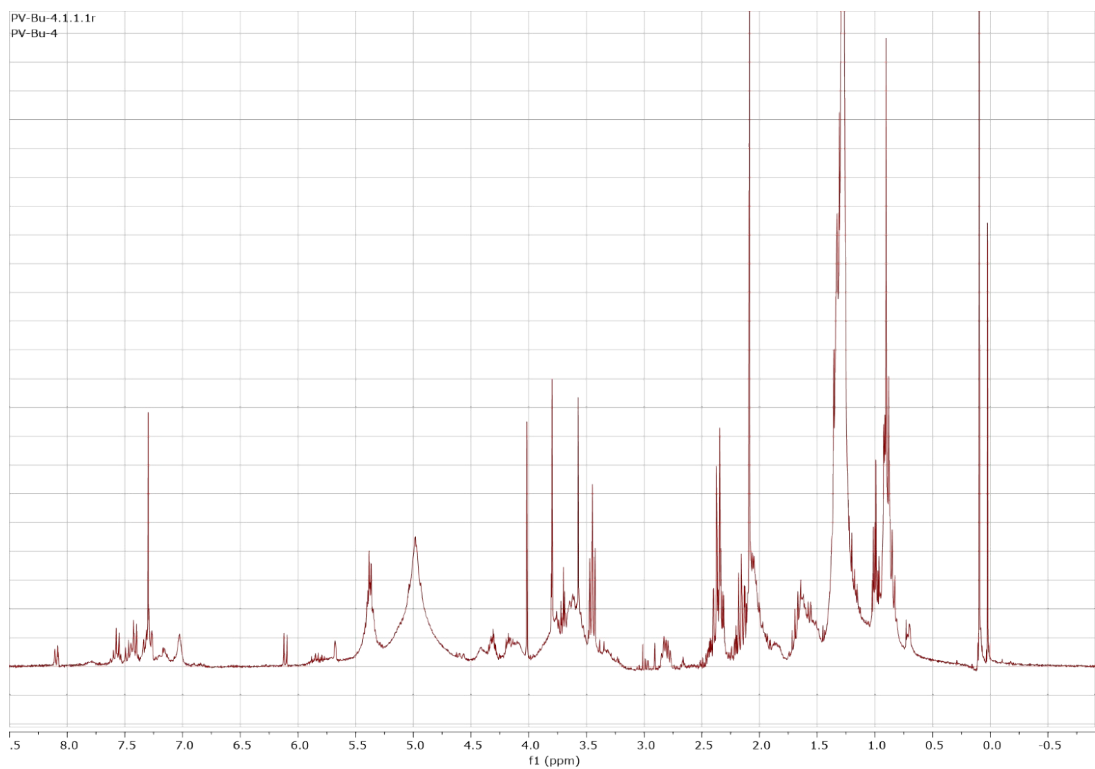

Figure S8.  $^1\text{H}$  NMR spectrum (300 MHz) of fraction PV-Bu-4 in  $\text{CDCl}_3$

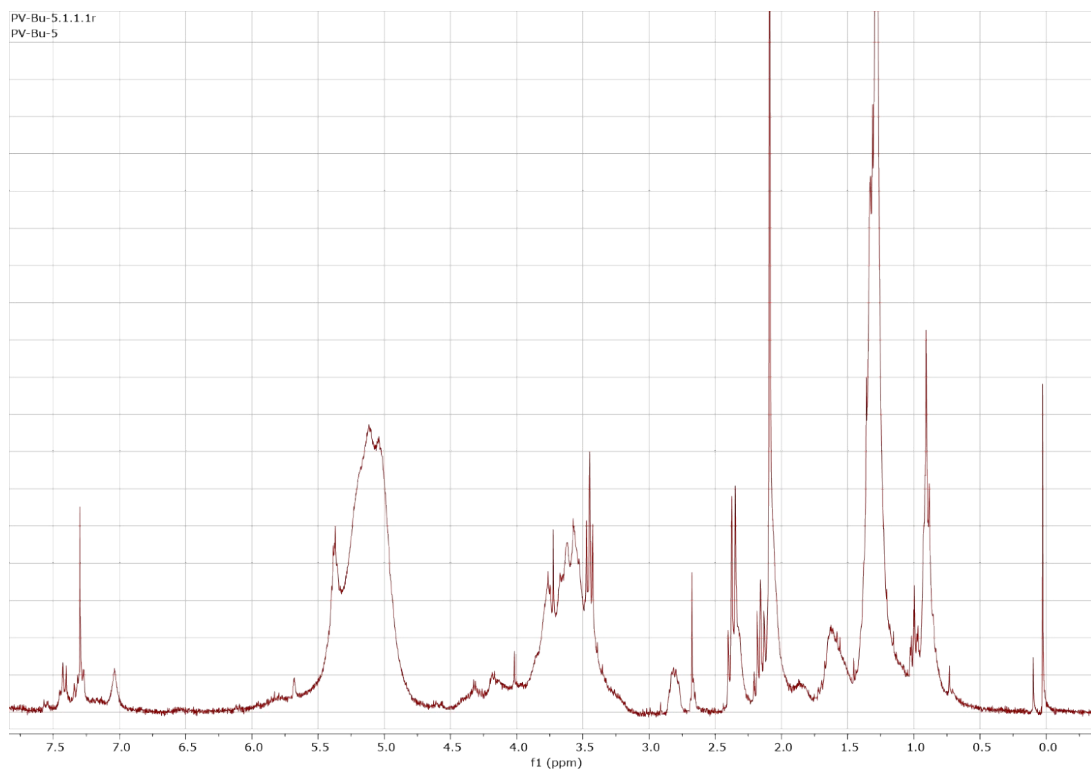

Figure S9. <sup>1</sup>H NMR spectrum (300 MHz) of fraction PV-Bu-5 in CDCl<sub>3</sub>

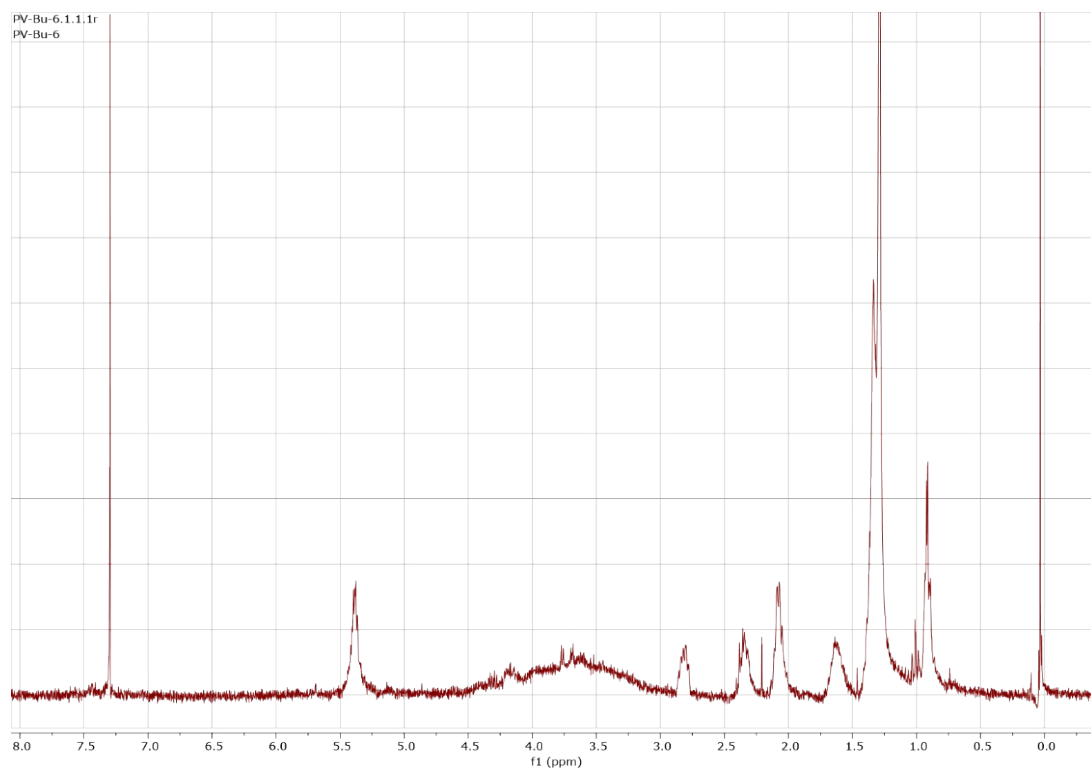

Figure S10. <sup>1</sup>H NMR spectrum (300 MHz) of fraction PV-Bu-6 in CDCl<sub>3</sub>



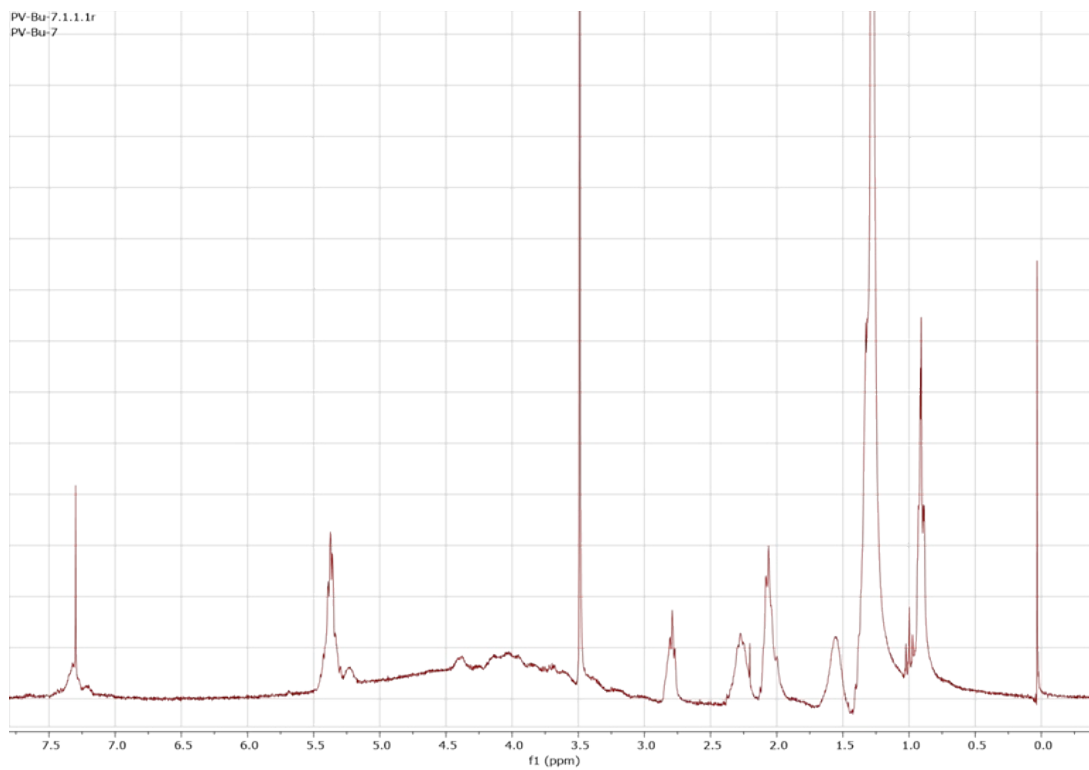

Figure S11.  $^1\text{H}$  NMR spectrum (300 MHz) of fraction PV-Bu-7 in  $\text{CDCl}_3$

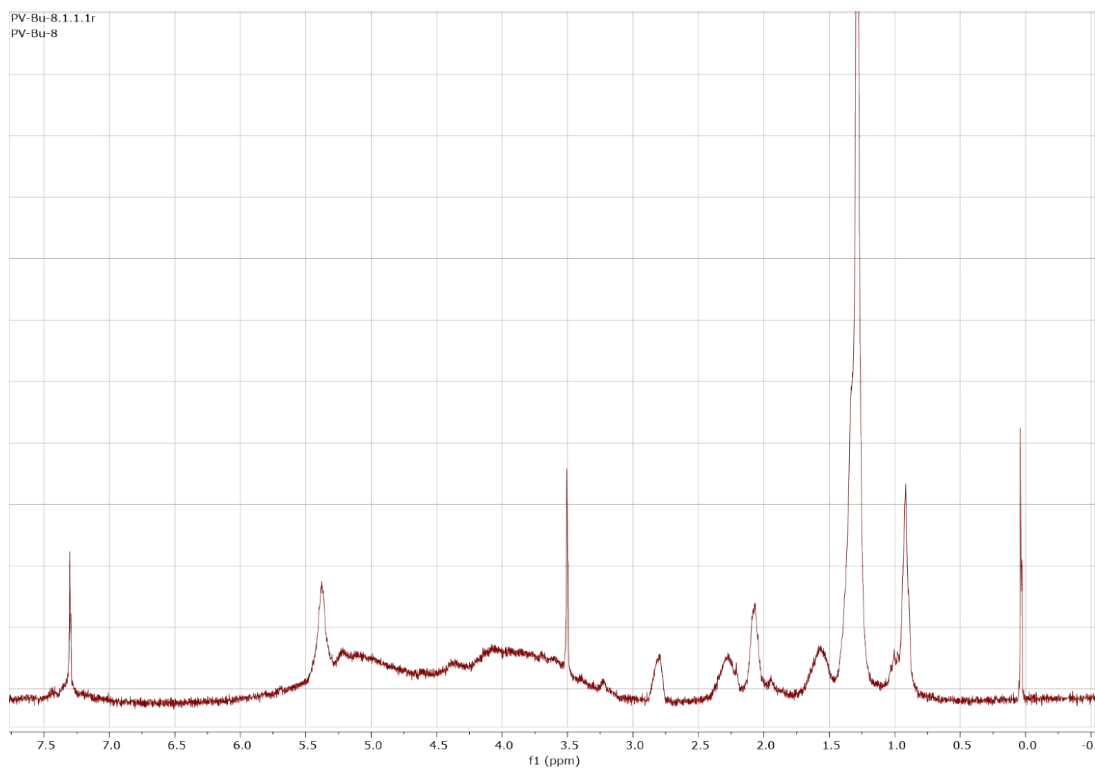

Figure S12.  $^1\text{H}$  NMR spectrum (300 MHz) of fraction PV-Bu-8 in  $\text{CDCl}_3$

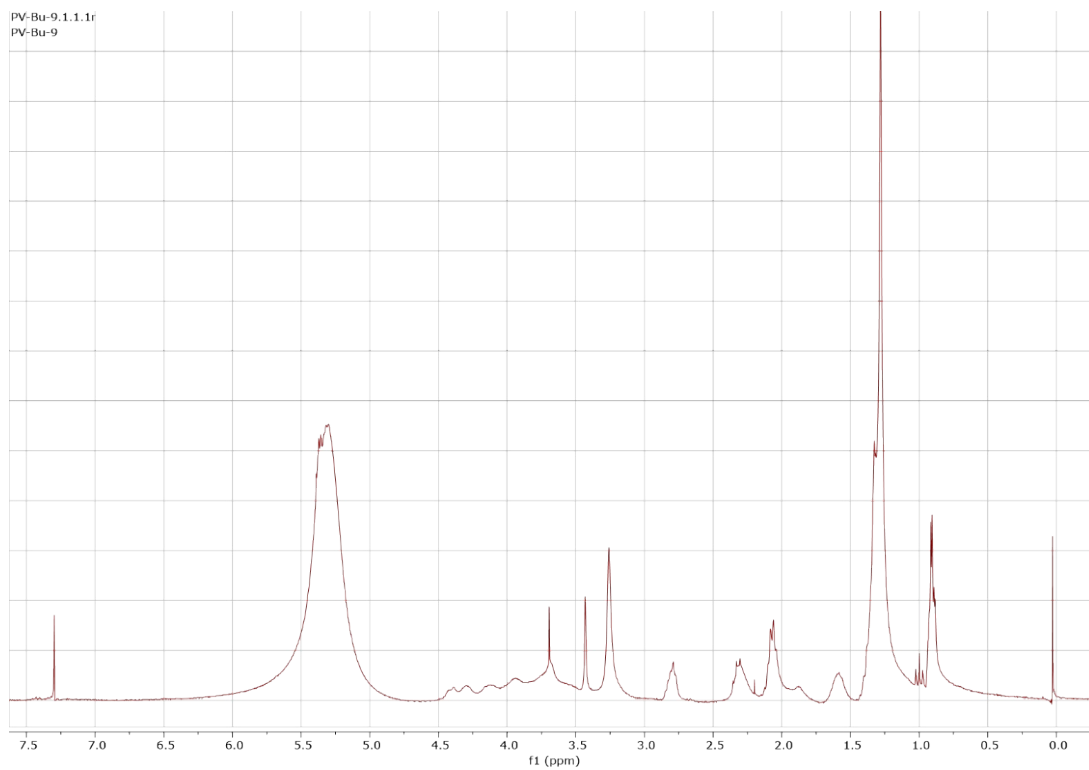

Figure S13.  $^1\text{H}$  NMR spectrum (300 MHz) of fraction PV-Bu-9 in  $\text{CDCl}_3$

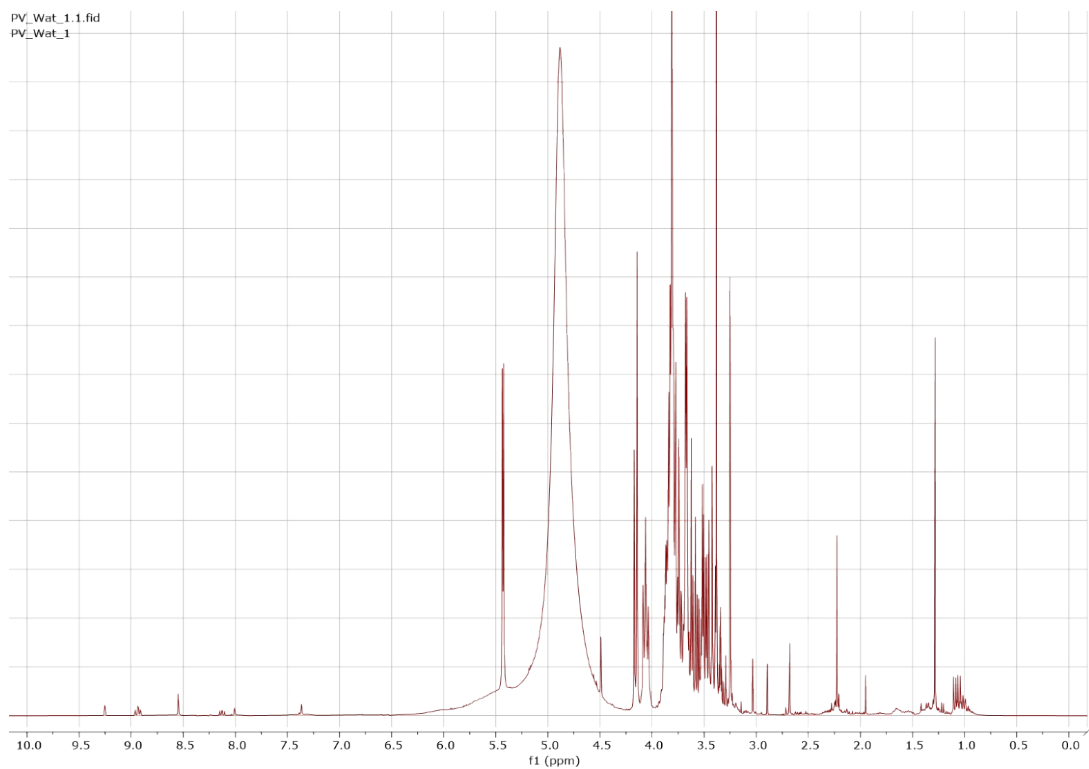

Figure S14.  $^1\text{H}$  NMR spectrum (300 MHz) of fraction PV- $\text{H}_2\text{O}$ -1 in  $\text{MeOH-}d_4$

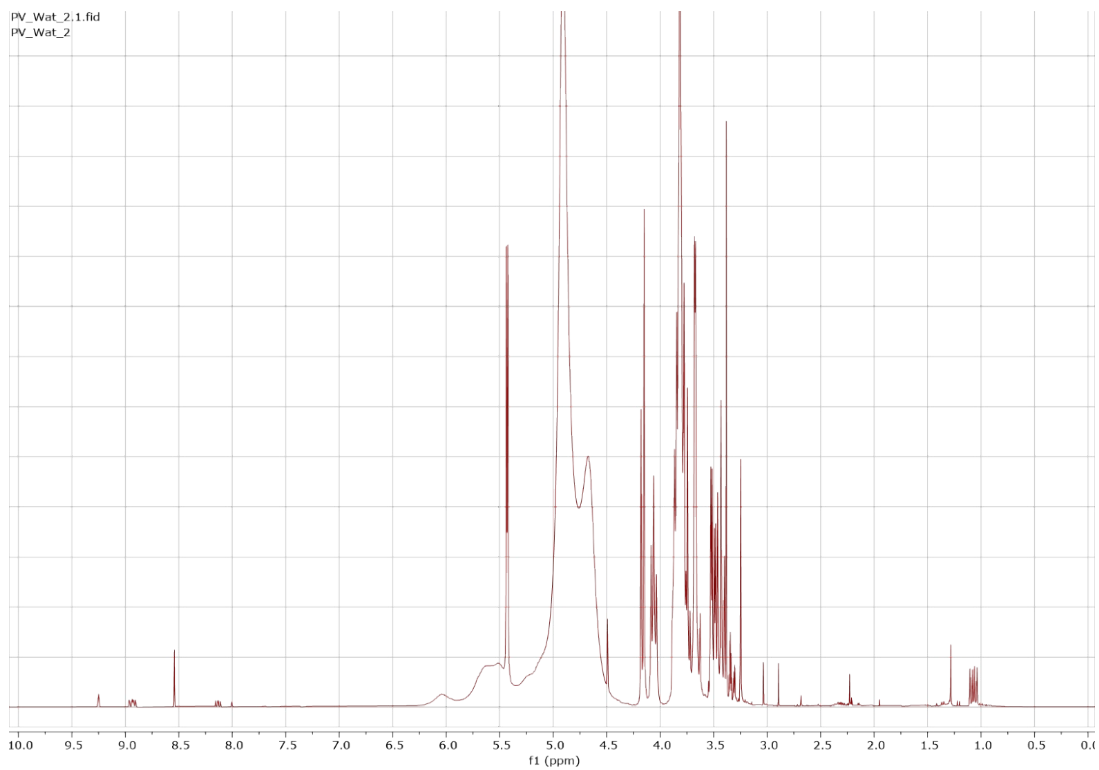

Figure S15.  $^1\text{H}$  NMR spectrum (300 MHz) of fraction PV-H<sub>2</sub>O-2 in MeOH-*d*<sub>4</sub>

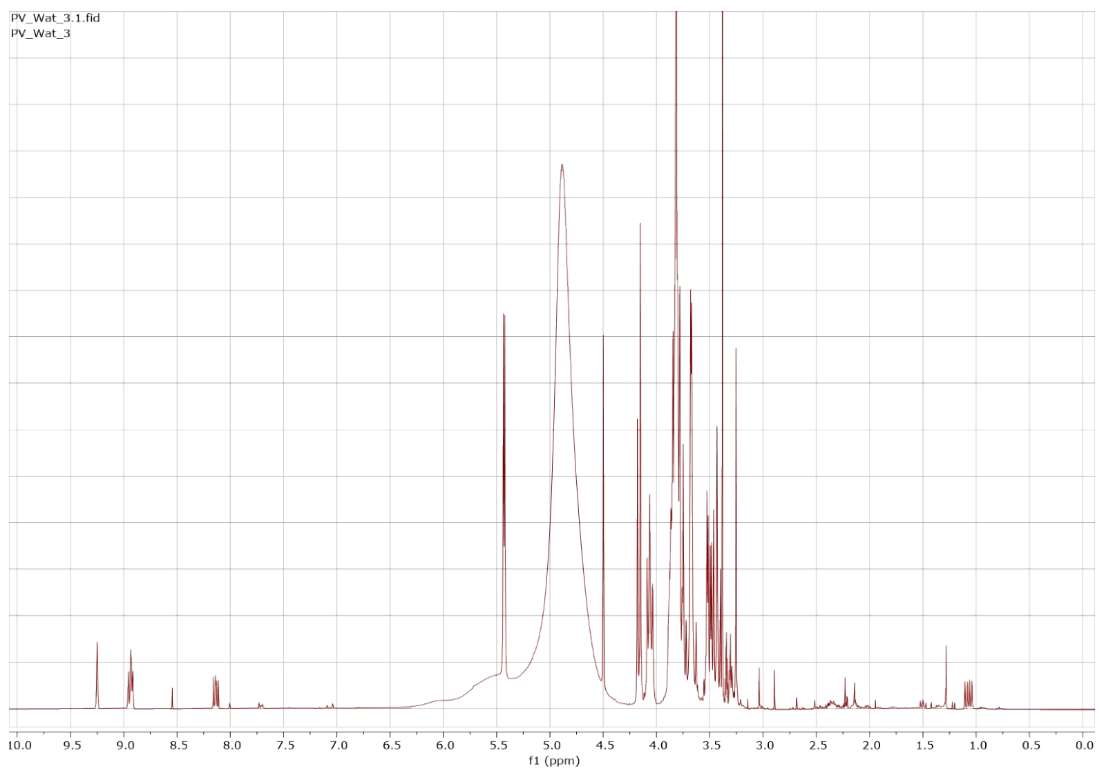

Figure S16.  $^1\text{H}$  NMR spectrum (300 MHz) of fraction PV-H<sub>2</sub>O-3 in MeOH-*d*<sub>4</sub>

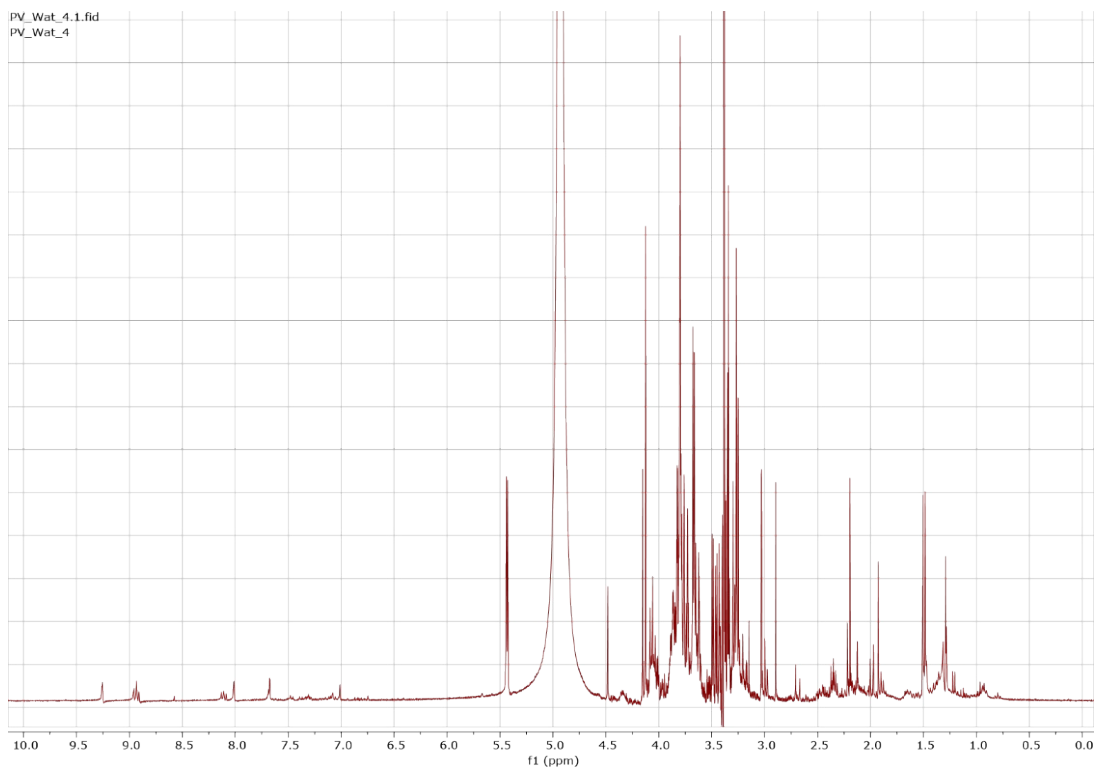

Figure S17.  $^1\text{H}$  NMR spectrum (300 MHz) of fraction PV- $\text{H}_2\text{O}$ -4 in  $\text{MeOH-}d_4$

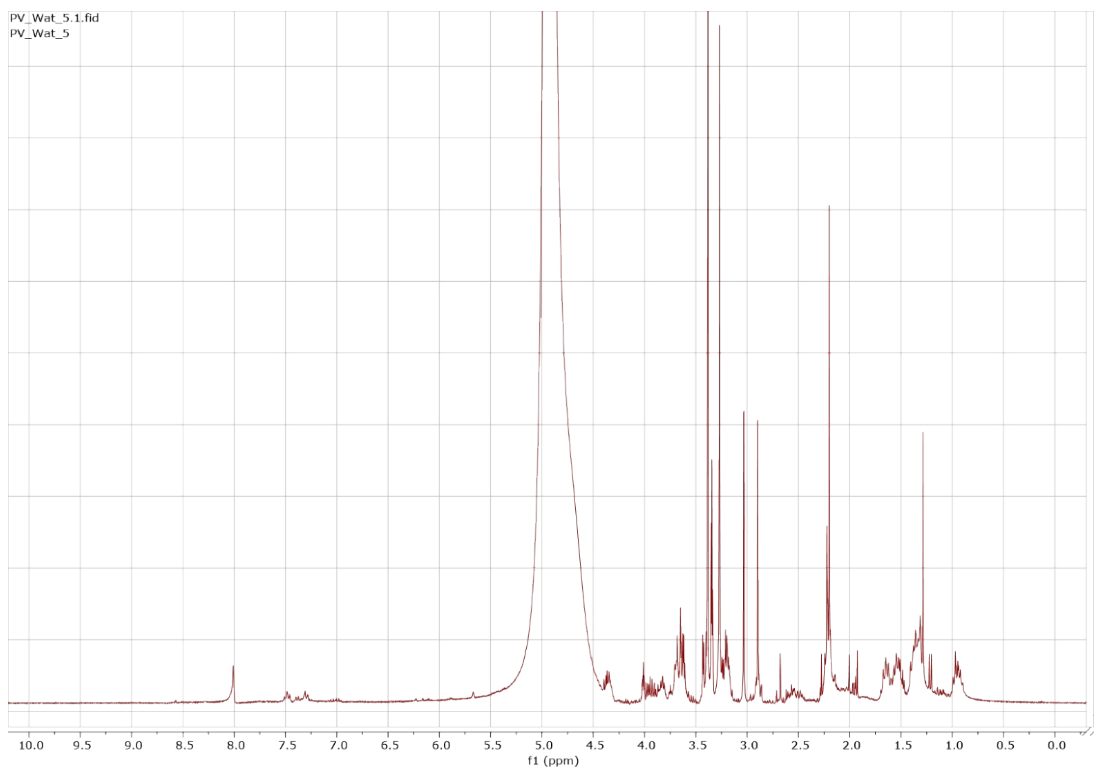

Figure S18.  $^1\text{H}$  NMR spectrum (300 MHz) of fraction PV- $\text{H}_2\text{O}$ -5 in  $\text{MeOH-}d_4$

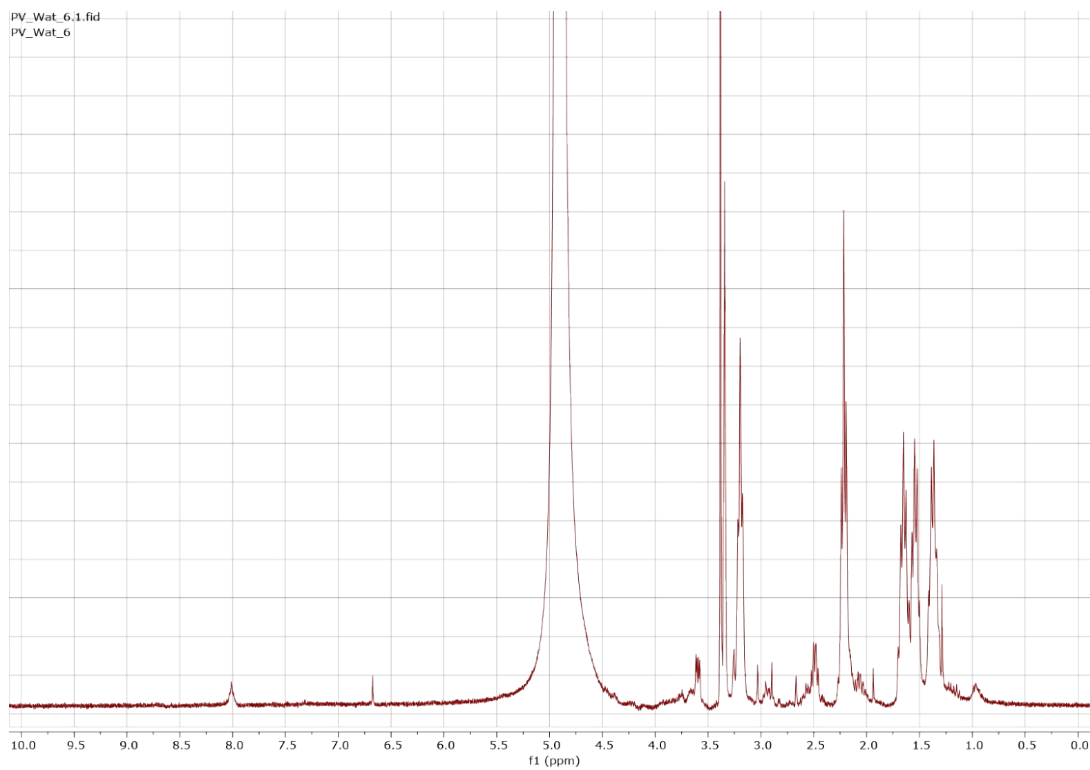

Figure S19. <sup>1</sup>H NMR spectrum (300 MHz) of fraction PV-H<sub>2</sub>O-6 in MeOH-*d*<sub>4</sub>

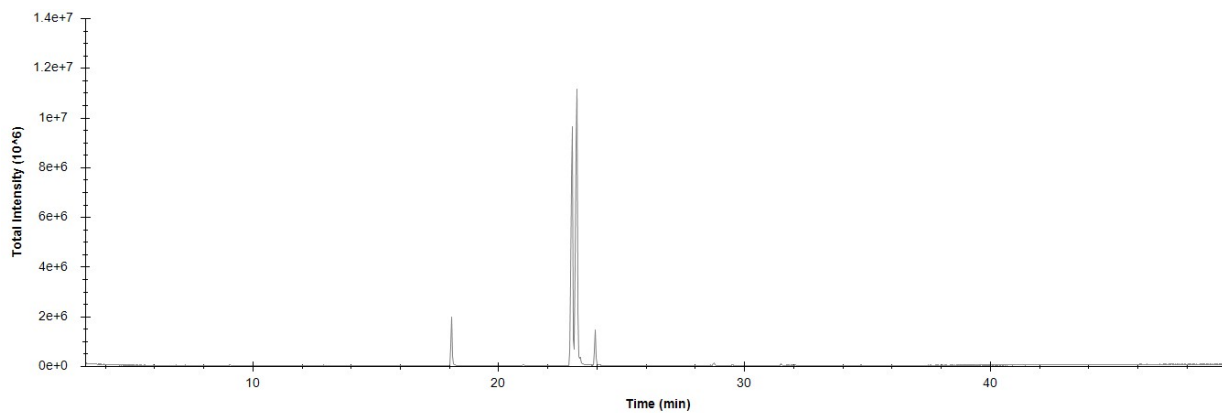

Figure S20. GC-MS spectrum of the SI oil FAMES

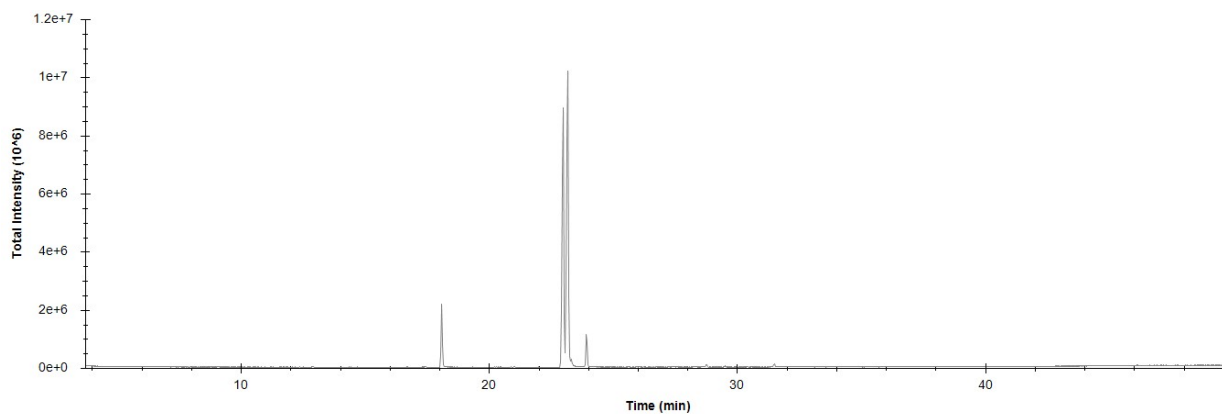

Figure S21. GC-MS spectrum of the n-hexane layer FAMES

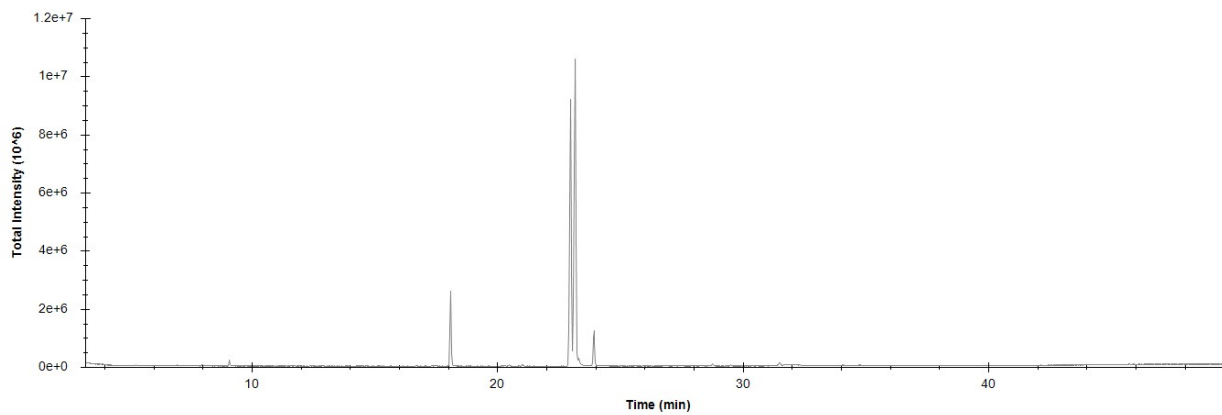

Figure S22. GC-MS spectrum of the EtOAc layer FAMES

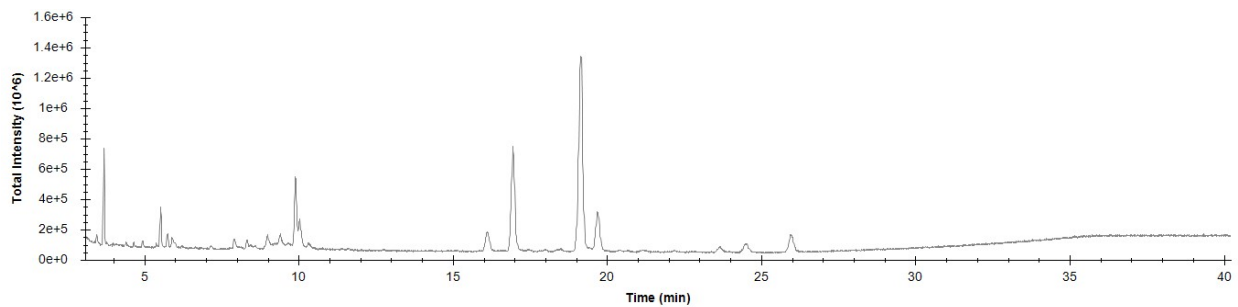

Figure S23. GC-MS spectrum of the saponified SI oil

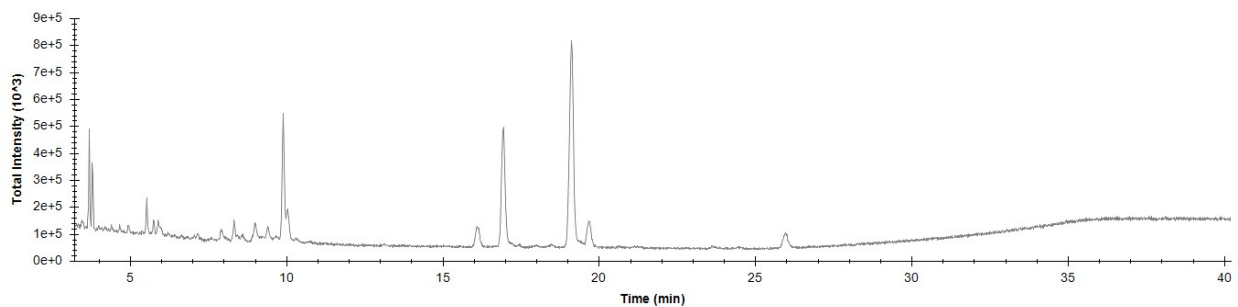

Figure S24. GC-MS spectrum of the saponified n-hexane layer

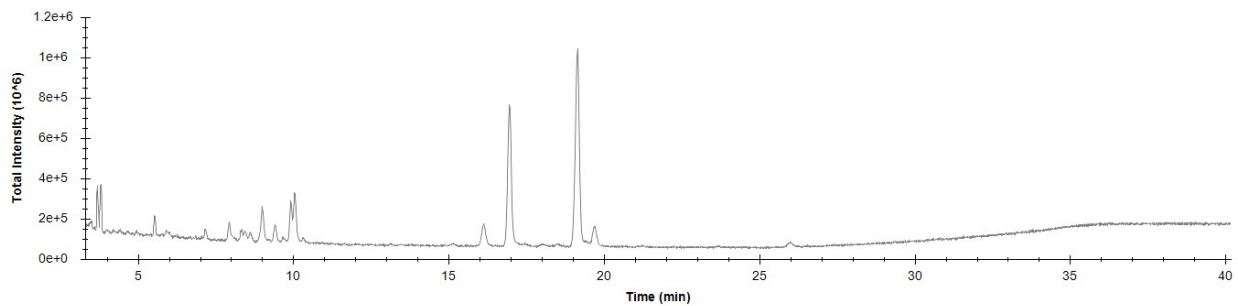

Figure S25. GC-MS spectrum of the saponified EtOAc layer

### Spectral node legend

Numbers: (+) precursor ion  $m/z$

Colors: The chemical classification by ClassyFire

Edge: The similarity of MS/MS spectrum. (cosine score)

- Fatty acyls
- Carbohydrates
- Amino acids, peptides, and analogues
- Pyrroles
- Diazinanes
- Polyketides
- Imidazopyrimidines
- Terpenoids
- Alkaloids
- No matches

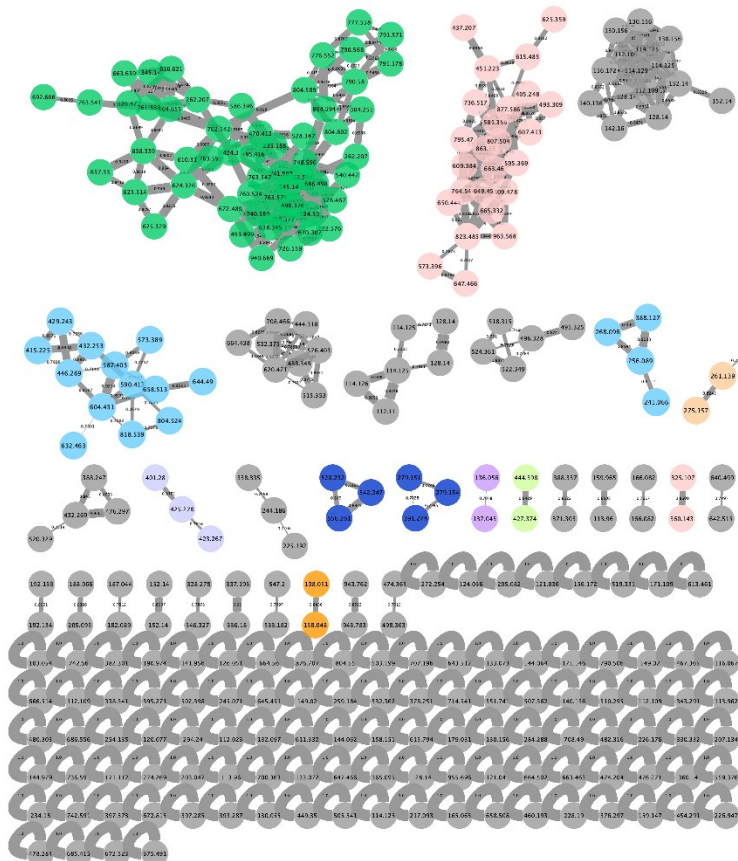

Figure S26. The metabolomic classification of fractions PV-Bu-1-9



## Spectral node legend

**Numbers:** (+) precursor ion  $m/z$

**Colors:** The chemical classification by ClassyFire

**Edge:** The similarity of MS/MS spectrum. (cosine score)

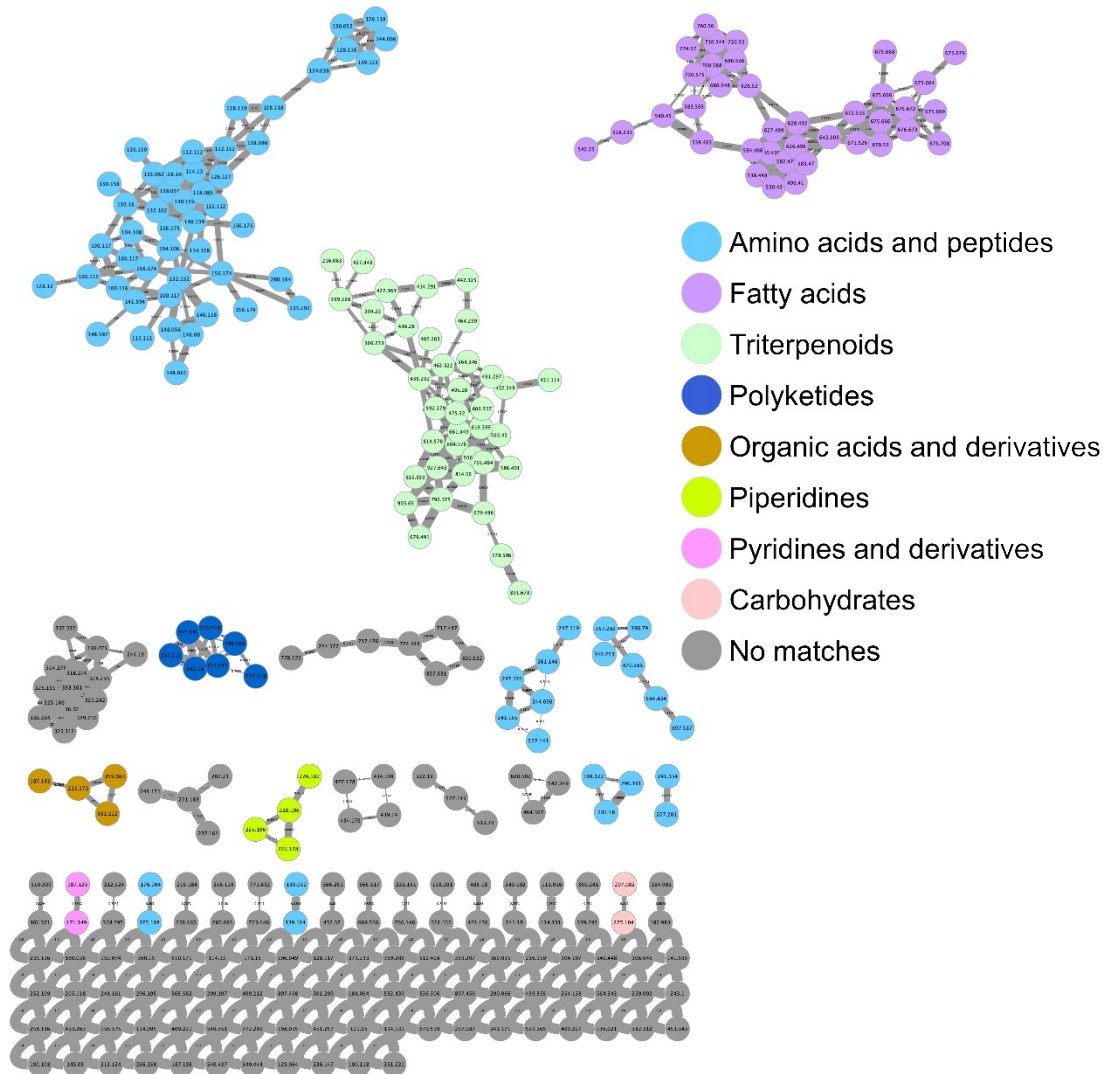

Figure S27. The metabolomic classification of fractions PV-H<sub>2</sub>O-1-6

# COMP 1

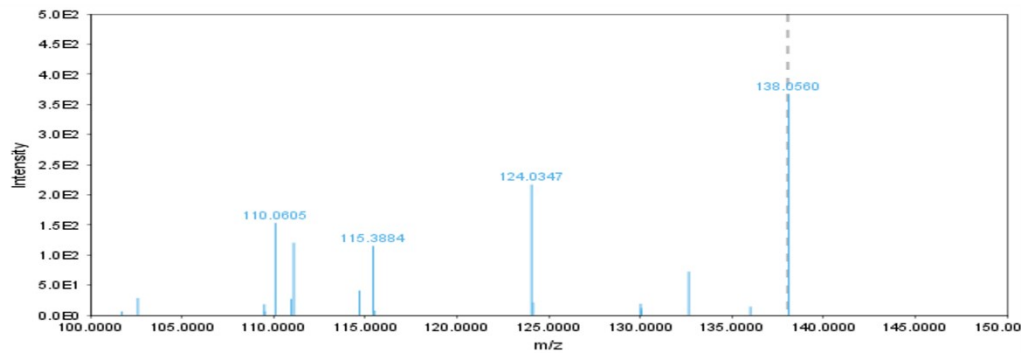

# COMP 2

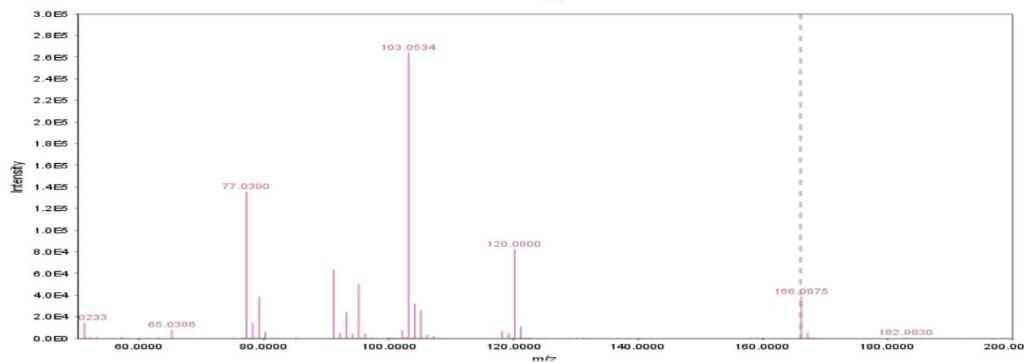

# COMP 3

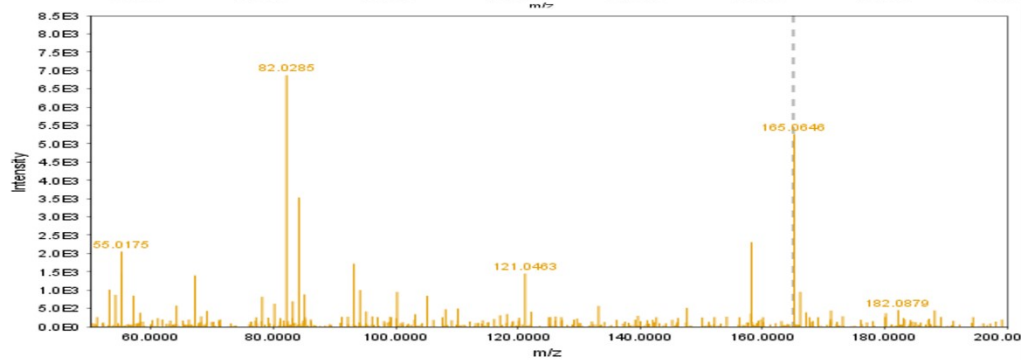

# COMP 4

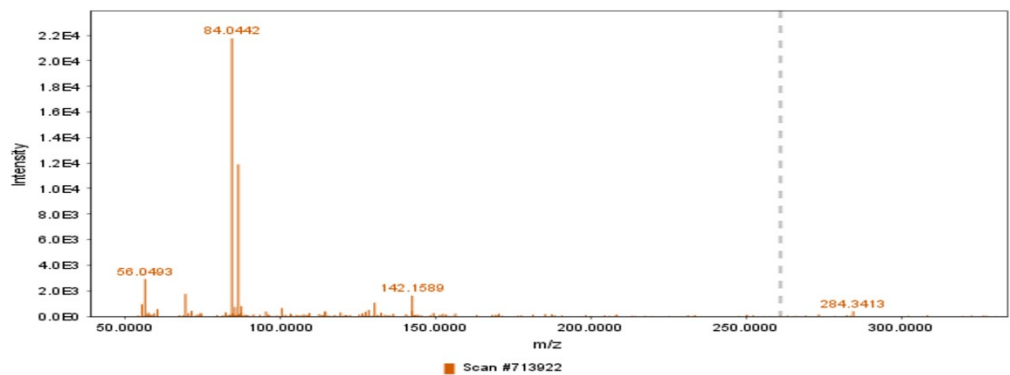

Figure S28. The MS<sup>2</sup> spectra of compounds 1–4

### COMP 5

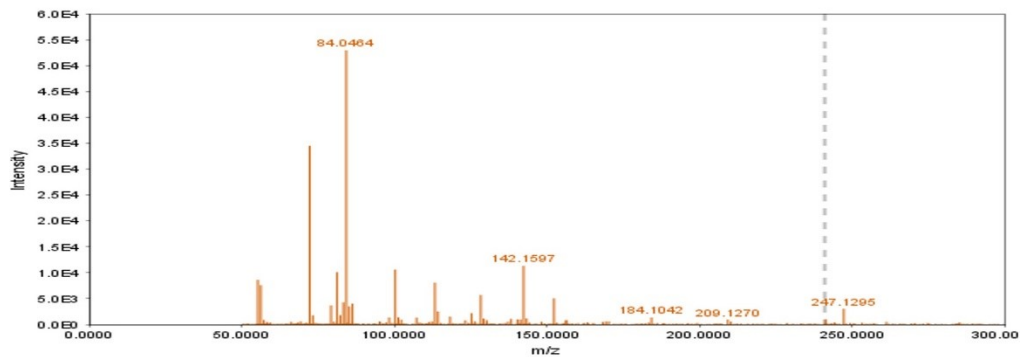

### COMP 6

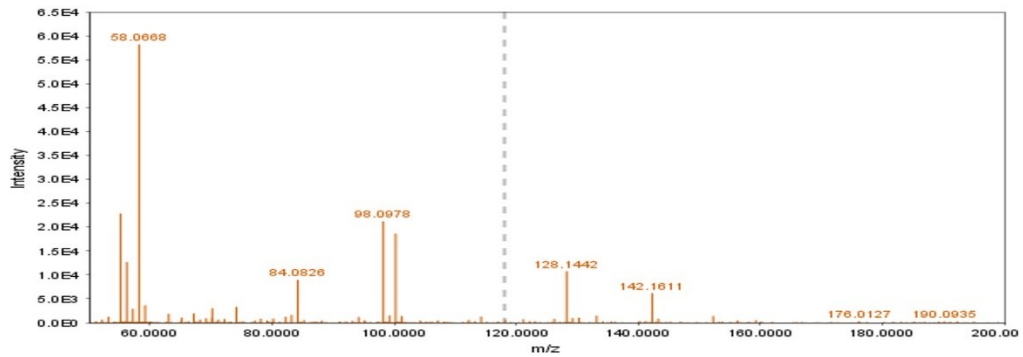

### COMP 7

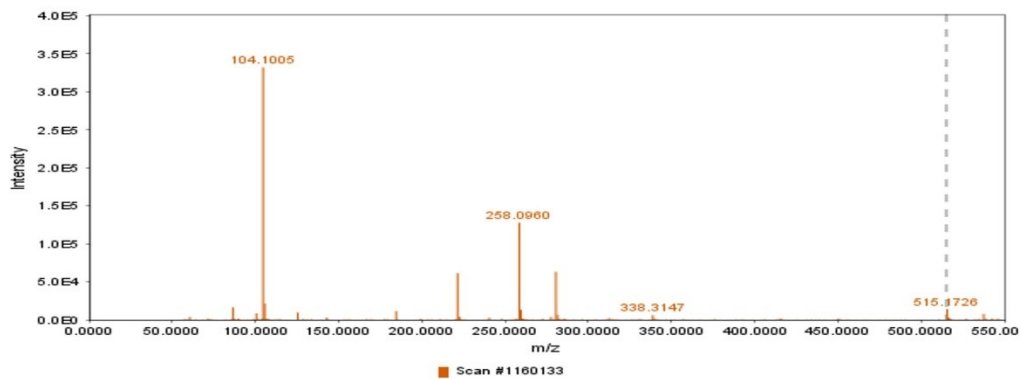

Figure S29. The MS<sup>2</sup> spectra of compounds 5–7

Detailed parameters used in the MZmine software:

# Peak Detection Noise level: MS1 1.0E4, MS2 1.0E3 # ADAP chromatogram builder Min group size: 3; Group intensity threshold: 1.0E3; min highest intensity: 2E2;  $m/z$  tolerance: 0.02 Da or 20 ppm # Chromatogram Deconvolution – Wavelets (ADAP) S/N threshold: 10; min feature height: 100;  $m/z$  range for MS2 scan pairing: 0.02 Da; RT range for MS2 scan pairing: 0.15 min. Chromatogram Deconvolution - Algorithm: ADAP wavelets;  $m/z$  range for MS2 scan pairing: 0.02 Da; RT range for MS2 scan pairing: 0.15 min; S/N threshold: 10; min feature height: 100; coefficient/area threshold: 50; Peak duration range: 0.05-1.00; RT wavelet range: 0.03-0.15 # isotopic peak grouper  $m/z$  tolerance: 0.01 Da or 10 ppm; RT tolerance: 0.1 min; Max charge: 2 # Group MS2 scans with features RT tolerance: 0.02 min;  $m/z$  tolerance: 0.01 Da or 10 ppm # Filter Keep only peaks with MS2 scan (GNPS) # Gap-Filling Intensity tolerance 20%; RT tolerance: 0.2 min for both;  $m/z$  tolerance: 0.02 Da or 20 ppm # GNPS export.

Table S1. Calibration curve, range, precision and accuracy of trigonelline

| Linearity                       | Precision                             |                         |                         | Accuracy                            |                      |            |
|---------------------------------|---------------------------------------|-------------------------|-------------------------|-------------------------------------|----------------------|------------|
| Calibration curve               | Concentration<br>( $\mu\text{g/mL}$ ) | Intraday<br>( $n = 6$ ) | Interday<br>( $n = 3$ ) | Spiked conc<br>( $\mu\text{g/mL}$ ) | Recovery rate<br>(%) | RSD<br>(%) |
| $Y = 20849X + 12735$            |                                       |                         |                         | 7.8                                 | 110.3%               | 1.56%      |
| $R^2 = 0.99996$                 | 40.23                                 | RSD =<br>0.407%         | RSD =<br>0.873%         | 31.25                               | 102.65%              | 0.41%      |
| Range: 3.9–250 $\mu\text{g/mL}$ |                                       |                         |                         | 125                                 | 99.4%                | 0.08%      |

Retention time: 7.15 min.
